# Supplementary material
Source: PubMed Central journal article supplement (PMC10811295)

Figure S1: Schematic for single cell cloning of donor MHC-II specific B cells and expression of BCRs as recombinant mlgG1.

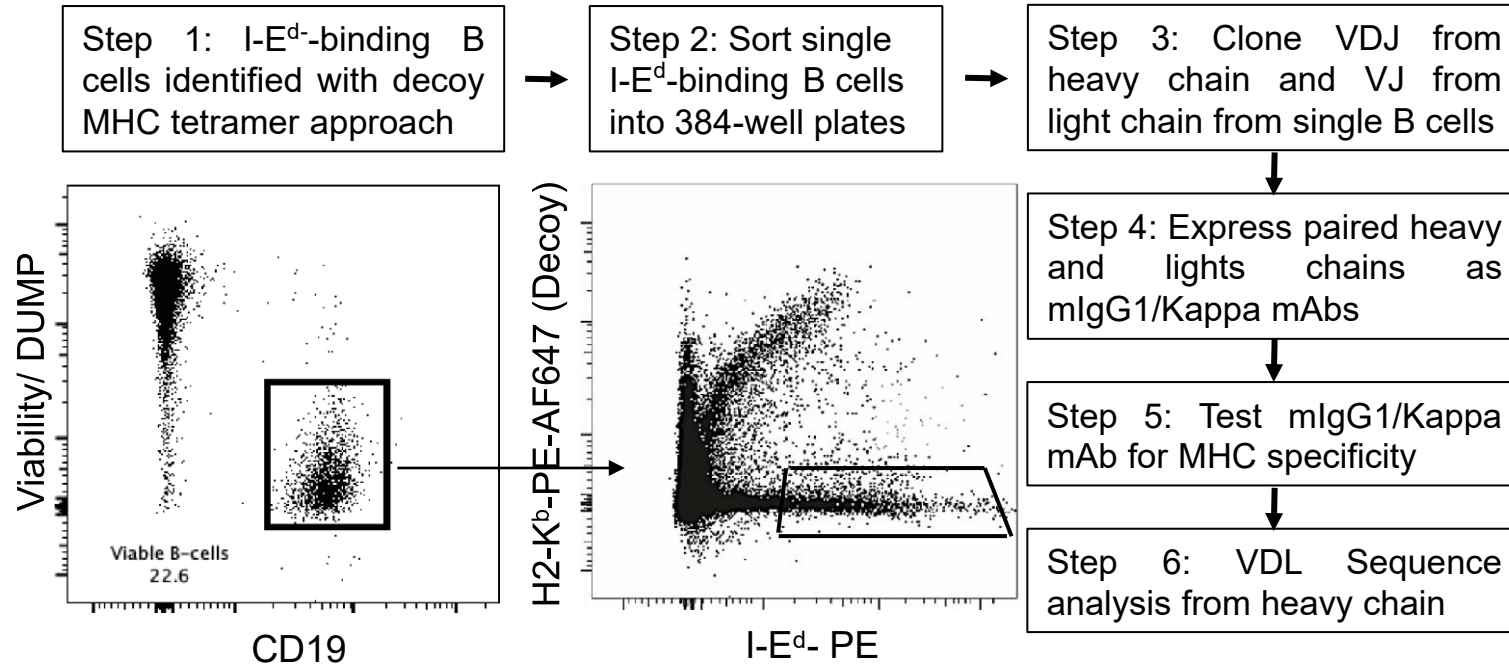

Figure S2: (A-C) Relative concentrations of IgG and Kappa in the culture supernatants of single BCR clones presented as MFI of the detection PE anti-mouse IgG. Each symbol represents one rlgG1 from naïve, tolerant or acute rejection mice. (D-E) Relative MFI of supernatants with high kappa concentrations binding to beads coated with donor I-E<sup>d</sup> or I-A<sup>d</sup>, or self I-A<sup>b</sup> antigen.

A. Naïve

B. Tolerant

C. Rejection

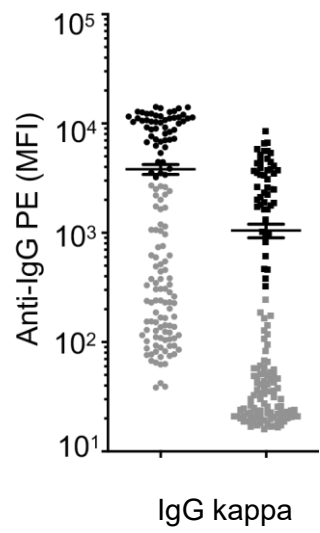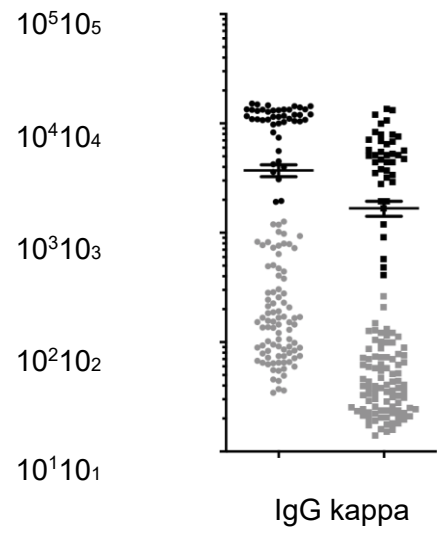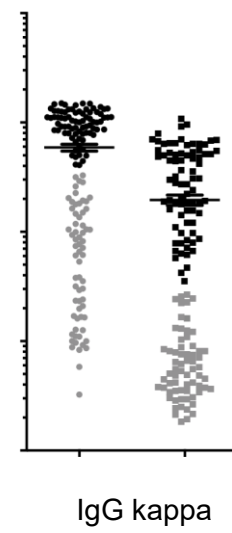

D. Naïve

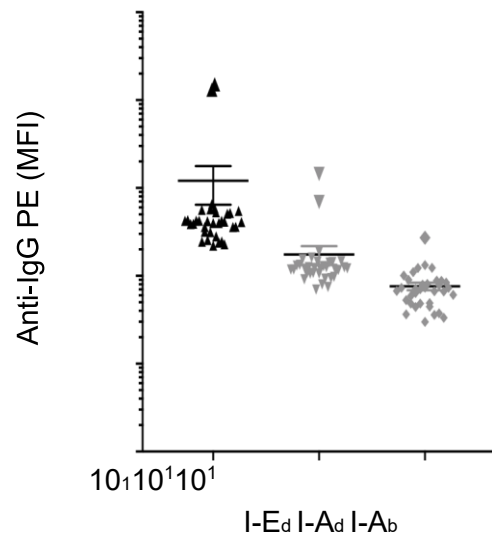

E. Tolerant

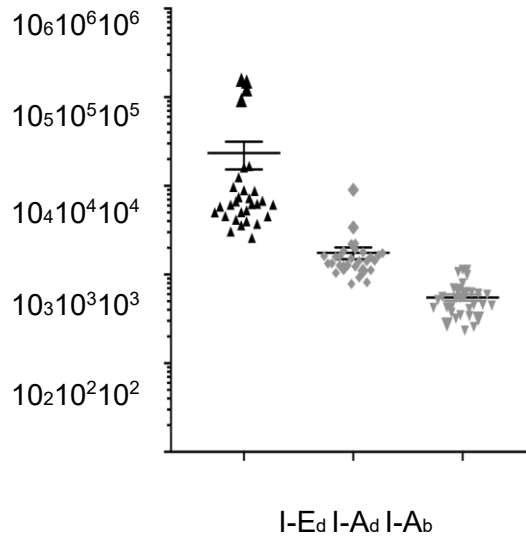

F. Rejection

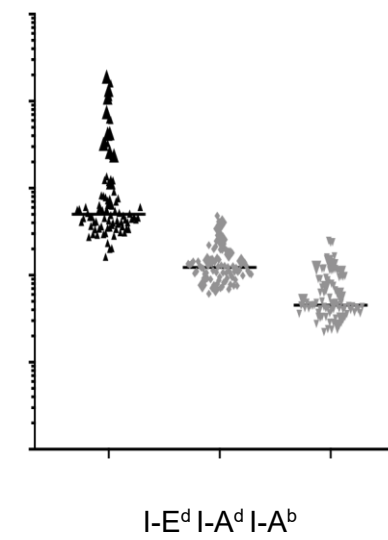

Figure S3: (A,B) Representative dilution series to determine  $K_D50$  for high and low avidity clones selected based on N-MFI.

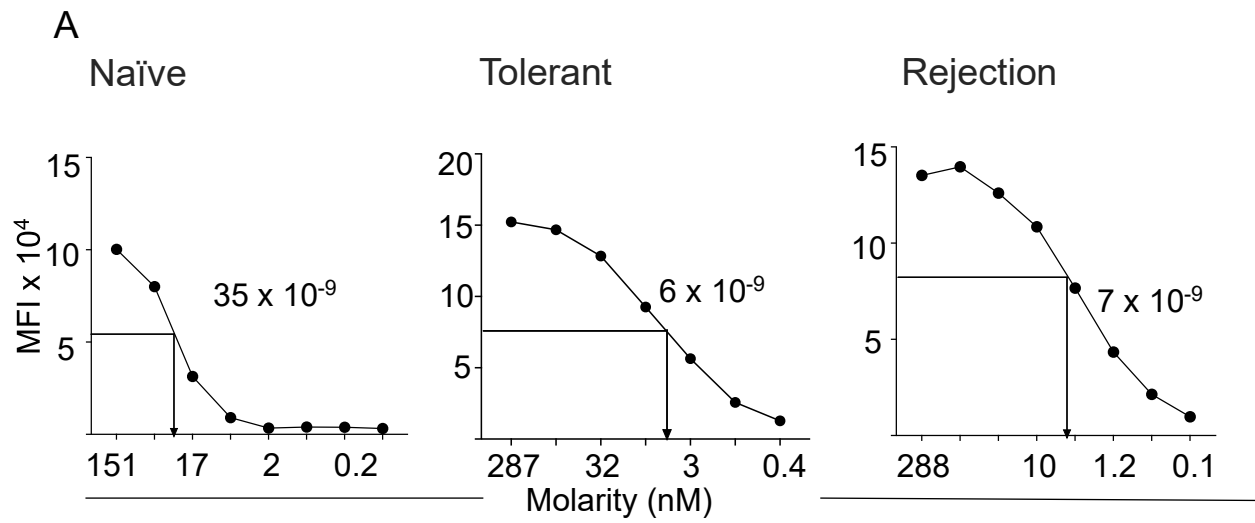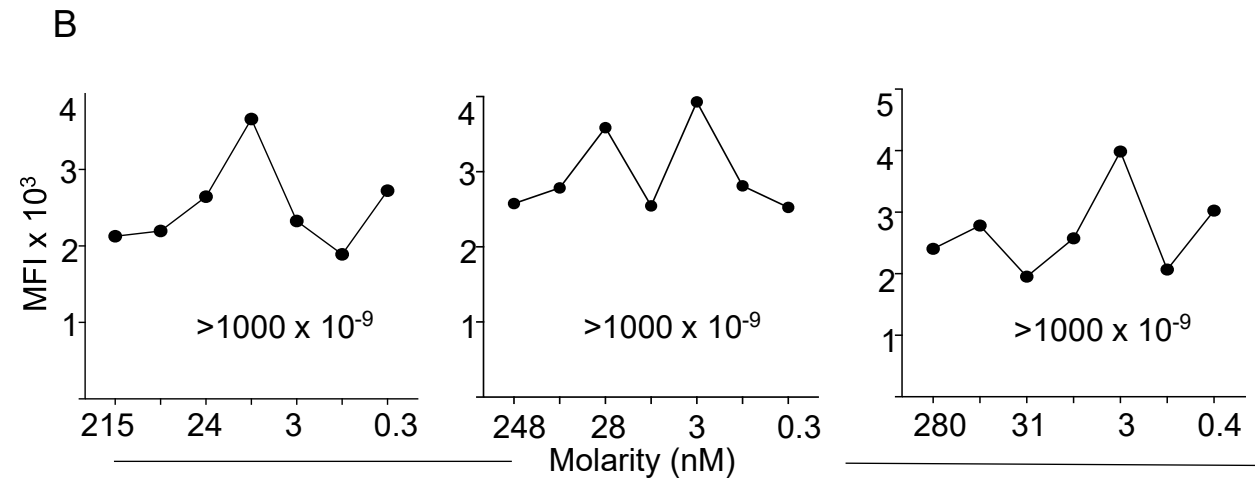

Figure S4: BCR avidity in naïve, tolerant, and acute rejection determined by SPR. (A-D) Sample SPR plots illustrating high and low avidity rIgG1

A.

B.

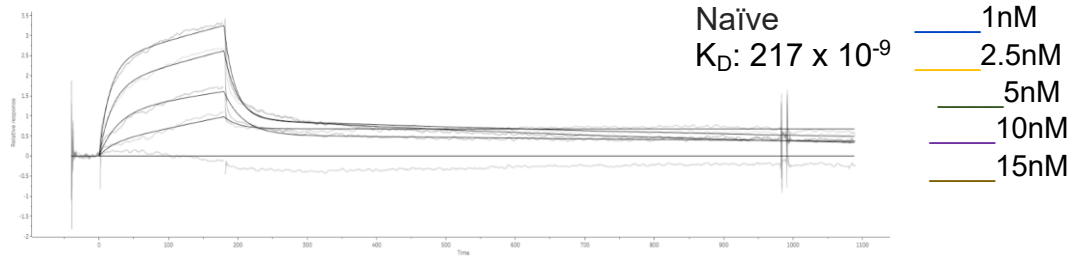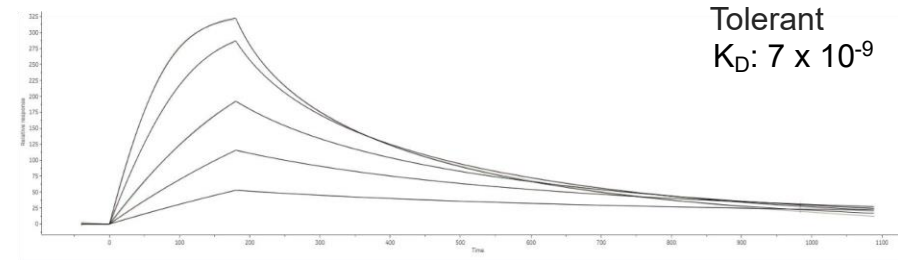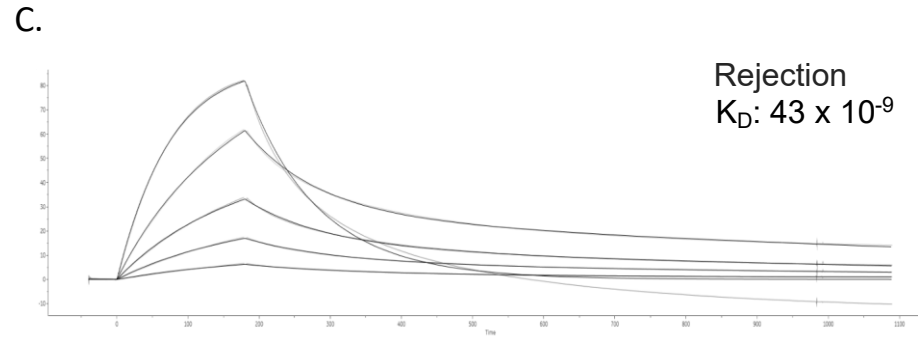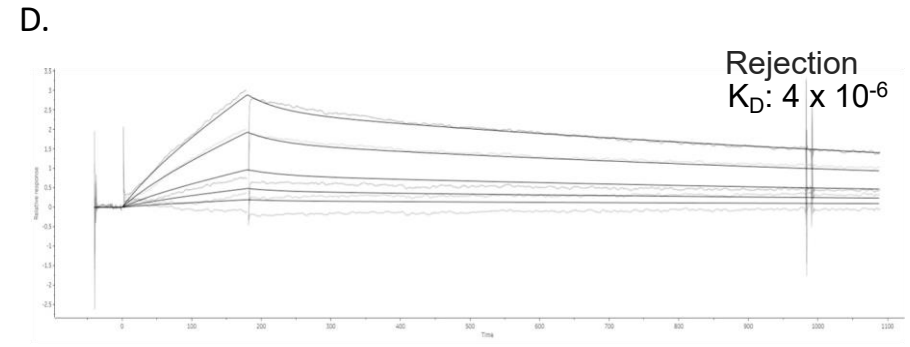

Supplement: NIHMS1904114-supplement-Supplemental_Digital_Content_to_Be_Published__cited_in_text_.pdf [file NIHMS1904114-supplement-Supplemental_Digital_Content_to_Be_Published__cited_in_text_.pdf]
